# Supplementary material for: Modeling Static Behavior of Rockfill Materials Based on Generalized Plasticity Model
Source: Hindawi journal article supplement (doi:10.1155/2019/2371709), 2019-01-01
Supplement: f1 [file 2371709.f1.zip]

Archive with 38 entries (33 files):
- 2371709.f1/Diorite rockfill materials test by Liu.xlsx
- 2371709.f1/Experiment of Xiao et al/
- 2371709.f1/Experiment of Xiao et al/0.189/
- 2371709.f1/Experiment of Xiao et al/0.189/1600-E1-EV.txt
- 2371709.f1/Experiment of Xiao et al/0.189/1600-E1-Q.txt
- 2371709.f1/Experiment of Xiao et al/0.189/400-E1-EV.txt
- 2371709.f1/Experiment of Xiao et al/0.189/400-E1-Q.txt
- 2371709.f1/Experiment of Xiao et al/0.189/800-E1-EV.txt
- 2371709.f1/Experiment of Xiao et al/0.189/800-E1-Q.txt
- 2371709.f1/Experiment of Xiao et al/0.244/
- 2371709.f1/Experiment of Xiao et al/0.244/1600-E1-EV.txt
- 2371709.f1/Experiment of Xiao et al/0.244/1600-E1-Q.txt
- 2371709.f1/Experiment of Xiao et al/0.244/400-E1-EV.txt
- 2371709.f1/Experiment of Xiao et al/0.244/400-E1-Q.txt
- 2371709.f1/Experiment of Xiao et al/0.244/800-E1-EV.txt
- 2371709.f1/Experiment of Xiao et al/0.244/800-E1-Q.txt
- 2371709.f1/Experiment of Xiao et al/0.285/
- 2371709.f1/Experiment of Xiao et al/0.285/1600-E1-EV.txt
- 2371709.f1/Experiment of Xiao et al/0.285/1600-E1-Q.txt
- 2371709.f1/Experiment of Xiao et al/0.285/400-E1-EV.txt
- 2371709.f1/Experiment of Xiao et al/0.285/400-E1-Q.txt
- 2371709.f1/Experiment of Xiao et al/0.285/800-E1-EV.txt
- 2371709.f1/Experiment of Xiao et al/0.285/800-E1-Q.txt
- 2371709.f1/Experiment of Xiao et al/0.317/
- 2371709.f1/Experiment of Xiao et al/0.317/1600-E1-EV.txt
- 2371709.f1/Experiment of Xiao et al/0.317/1600-E1-Q.txt
- 2371709.f1/Experiment of Xiao et al/0.317/400-E1-EV.txt
- 2371709.f1/Experiment of Xiao et al/0.317/400-E1-Q.txt
- 2371709.f1/Experiment of Xiao et al/0.317/800-E1-EV.txt
- 2371709.f1/Experiment of Xiao et al/0.317/800-E1-Q.txt
- 2371709.f1/Monitoring results of Sanbanxi Rockfill Dam.xlsx
- 2371709.f1/Rumei rockfill materials test-3200kPa.xlsx
- 2371709.f1/Sanbanxi-test.xlsx
- 2371709.f1/Sandstone rockfill materials test.xlsx
- 2371709.f1/triaxial tests of granite rockfills by Jia 2012.xlsx
- 2371709.f1/Yang-constant P test.xlsx
- 2371709.f1/Yang-constant stress ratio test.xlsx
- 2371709.f1/Yang-conventional triaxial test.xlsx
