# Supplementary material for: Modeling Static Behavior of Rockfill Materials Based on Generalized Plasticity Model
Source: Hindawi journal article supplement (doi:10.1155/2019/2371709), 2019-01-01
Supplement: f1 [file 2371709.f1.zip › 2371709.f1/Diorite rockfill materials test by Liu.xlsx]

## Sheet: E1-Q
400		1200		2000		3500
εa	σ1-σ3
%	kPa
0	0	0		0		0
0.0241692	22.8137	0.0241692	0	0	0	0	22.8137
0.217523	91.2548	0.145015	228.137	0.0966767	273.764	0.0966767	250.951
0.362538	159.696	0.193353	387.833	0.145015	433.46	0.193353	524.715
0.507553	250.951	0.29003	547.529	0.241692	615.97	0.338369	775.665
0.676737	365.019	0.386707	707.224	0.314199	730.038	0.555891	1186.31
0.870091	456.274	0.507553	844.106	0.410876	912.548	0.725076	1505.7
1.06344	570.342	0.60423	980.989	0.555891	1140.68	0.918429	1870.72
1.2568	661.597	0.773414	1117.87	0.676737	1300.38	1.11178	2212.93
1.52266	752.852	0.942598	1323.19	0.821752	1437.26	1.28097	2509.51
1.76435	844.106	1.16012	1482.89	0.918429	1642.59	1.49849	2874.52
2.03021	935.361	1.30514	1619.77	1.03927	1802.28	1.83686	3262.36
2.36858	1026.62	1.59517	1825.1	1.20846	2007.6	2.00604	3536.12
2.68278	1095.06	1.83686	2007.6	1.35347	2121.67	2.39275	4015.21
3.02115	1186.31	2.07855	2167.3	1.49849	2258.56	2.75529	4380.23
3.23867	1231.94	2.34441	2327	1.66767	2463.88	3.09366	4790.87
3.55287	1254.75	2.5861	2463.88	1.81269	2623.57	3.38369	5133.08
3.8429	1300.38	2.82779	2577.95	2.05438	2806.08	3.69789	5498.1
4.30211	1391.63	3.09366	2714.83	2.2719	3011.41	4.10876	5863.12
4.56798	1414.45	3.43202	2828.9	2.5136	3171.1	4.39879	6068.44
4.95468	1482.89	3.79456	2965.78	2.82779	3444.87	4.7855	6433.46
5.24471	1505.7	4.13293	3057.03	3.09366	3650.19	5.12387	6821.29
5.63142	1528.52	4.44713	3171.1	3.45619	3901.14	5.4864	7072.24
5.96979	1574.14	4.83384	3262.36	3.86707	4174.9	5.8006	7323.19
6.30816	1619.77	5.12387	3376.43	4.22961	4471.48	6.13897	7574.14
6.69486	1642.59	5.53474	3467.68	4.71299	4745.25	6.47734	7825.1
7.03323	1688.21	5.77644	3558.94	5.14804	4927.76	6.79154	8007.6
7.39577	1711.03	6.13897	3650.19	5.51057	5110.27	7.15408	8212.93
7.83082	1711.03	6.54985	3695.82	5.99396	5292.78	7.49245	8441.06
8.24169	1711.03	6.81571	3764.26	6.3565	5452.47	7.83082	8669.2
8.60423	1711.03	7.20242	3787.07	6.76737	5566.54	8.24169	8828.9
8.99094	1711.03	7.63746	3878.33	7.29909	5703.42	8.87009	9057.03
9.6435	1733.84	8.09668	3923.95	7.83082	5817.49	9.49849	9307.98
10.2477	1756.65	8.43505	3923.95	8.3142	5908.75	9.8852	9376.43
10.997	1756.65	8.74924	3992.4	8.9426	6091.25	10.2719	9558.94
11.7221	1802.28	9.2568	3992.4	9.6435	6159.7	10.7553	9764.26
12.3746	1825.1	9.78852	3992.4	10.1269	6205.32	11.287	9923.95
13.003	1802.28	10.3927	4038.02	10.7553	6342.21	11.7462	10083.7
13.7523	1779.47	11.0695	4060.84	11.3353	6433.46	12.1571	10197.7
14.3565	1756.65	11.7462	4152.09	12.0363	6433.46	12.6647	10311.8
15.0332	1802.28	12.4713	4152.09	12.8097	6433.46	13.148	10425.9
15.71	1825.1	13.0514	4152.09	13.4864	6410.65	13.7523	10562.7
		13.5831	4174.9	14.1631	6433.46	14.2356	10722.4
		14.1148	4197.72	14.7915	6433.46	14.7432	10813.7
		14.4532	4197.72	15.4441	6387.83	15.2991	10836.5
		14.8399	4243.35
		15.3958	4220.53
		15.8792	4220.53

## Sheet: E1-EV
400		1200		2000		3500
εa	εv
%	%
0.164384	0.0838509	0	0.00931677	0.0182648	0	0	0
0.273973	0.130435	0.109589	0.111801	0.146119	0.130435	0.109589	0.139752
0.511416	0.232919	0.200913	0.177019	0.255708	0.195652	0.200913	0.232919
0.748858	0.335404	0.347032	0.242236	0.365297	0.279503	0.328767	0.28882
0.894977	0.419255	0.52968	0.335404	0.474886	0.34472	0.438356	0.409938
0.968037	0.484472	0.694064	0.437888	0.60274	0.465839	0.621005	0.512422
1.09589	0.57764	0.840183	0.521739	0.694064	0.521739	0.748858	0.614907
1.2968	0.698758	1.00457	0.624224	0.821918	0.614907	0.894977	0.698758
1.53425	0.791925	1.20548	0.745342	0.968037	0.698758	1.02283	0.791925
1.78995	0.885093	1.3516	0.838509	1.07763	0.791925	1.16895	0.885093
2.06393	0.987578	1.47945	0.950311	1.18721	0.885093	1.2968	0.940994
2.28311	1.09006	1.62557	1.08075	1.3516	0.987578	1.44292	1.04348
2.57534	1.17391	1.71689	1.17391	1.47945	1.06211	1.62557	1.13665
2.83105	1.25776	1.88128	1.26708	1.6621	1.1646	1.82648	1.2764
3.12329	1.35093	2.06393	1.36957	1.78995	1.22981	1.99087	1.36957
3.48858	1.4441	2.28311	1.48137	1.93607	1.31366	2.19178	1.46273
3.90868	1.50932	2.48402	1.5559	2.10046	1.40683	2.39269	1.58385
4.25571	1.58385	2.6484	1.67702	2.21005	1.5	2.55708	1.6677
4.63927	1.63043	2.79452	1.74224	2.42922	1.58385	2.81279	1.82609
5.00457	1.68634	2.92237	1.82609	2.61187	1.68634	2.99543	1.92857
5.38813	1.69565	3.19635	1.90994	2.79452	1.78882	3.19635	2.08696
5.75342	1.73292	3.48858	2.04037	2.97717	1.90062	3.36073	2.22671
6.22831	1.77019	3.72603	2.11491	3.17808	1.97516	3.74429	2.45963
6.72146	1.80745	4.03653	2.25466	3.379	2.05901	4.07306	2.62733
7.03196	1.78882	4.47489	2.39441	3.61644	2.16149	4.49315	2.78571
7.379	1.7795	4.82192	2.51553	3.81735	2.27329	4.80365	2.99068
7.81735	1.7795	5.27854	2.58075	4.01826	2.39441	5.13242	3.17702
8.38356	1.80745	5.64384	2.70186	4.40183	2.57143	5.49772	3.31677
8.93151	1.77019	6.10046	2.79503	4.85845	2.74845	5.84475	3.48447
9.55251	1.76087	6.50228	2.86025	5.11416	2.81366	6.13699	3.62422
10.0274	1.76087	7.05023	2.9441	5.40639	2.93478	6.57534	3.83851
10.6849	1.74224	7.45205	3.02795	5.80822	3.1118	6.90411	4.0528
11.2511	1.73292	8.03653	3.06522	6.22831	3.18634	7.21461	4.1646
11.7991	1.67702	8.6758	3.13043	6.50228	3.29814	7.50685	4.29503
12.4018	1.6677	9.40639	3.17702	6.84932	3.40062	7.85388	4.50932
12.8584	1.63975	10.1187	3.20497	7.17808	3.49379	8.18265	4.71429
13.3881	1.60248	10.758	3.26087	7.41553	3.53106	8.58447	4.81677
13.8082	1.58385	11.5068	3.2795	7.6895	3.60559	8.91324	4.99379
14.3196	1.54658	12.1644	3.31677	8	3.68012	9.2968	5.08696
14.8676	1.5	12.8402	3.35404	8.32877	3.76398	9.58904	5.21739
15.4338	1.41615	13.589	3.37267	8.65753	3.81988	9.91781	5.28261
15.7808	1.36025	14.21	3.40994	9.00457	3.87578	10.2283	5.36646
		14.9041	3.43789	9.33333	3.93168	10.5753	5.42236
		15.5068	3.43789	9.75342	3.99689	10.9589	5.49689
		15.8904	3.40994	10.0639	4.0528	11.3242	5.5528
				10.411	4.11801	11.5982	5.58075
				10.7945	4.18323	12.0183	5.63665
				11.2146	4.23913	12.3836	5.69255
				11.7991	4.32298	12.7123	5.73913
				12.4749	4.3882	13.2237	5.81366
				12.9315	4.43478	13.6256	5.82298
				13.4429	4.47205	14.137	5.87888
				13.9909	4.51863	14.6667	5.91615
				14.5753	4.56522	15.0685	5.97205
				15.0868	4.62112	15.3059	5.97205
				15.5434	4.63043
