# Supplementary material for: Modeling Static Behavior of Rockfill Materials Based on Generalized Plasticity Model
Source: Hindawi journal article supplement (doi:10.1155/2019/2371709), 2019-01-01
Supplement: f1 [file 2371709.f1.zip › 2371709.f1/Experiment of Xiao et al/0.189/400-E1-EV.txt]

0.00E+00	0.00E+00
1.49E-01	9.23E-02
2.34E-01	1.38E-01
3.40E-01	1.85E-01
4.25E-01	2.15E-01
5.34E-01	1.85E-01
6.42E-01	1.38E-01
7.51E-01	9.23E-02
8.60E-01	3.08E-02
1.01E+00	-1.54E-02
1.12E+00	-9.23E-02
1.29E+00	-1.38E-01
1.51E+00	-2.15E-01
1.75E+00	-3.38E-01
1.95E+00	-4.77E-01
2.34E+00	-6.62E-01
2.60E+00	-8.31E-01
2.95E+00	-1.06E+00
3.27E+00	-1.18E+00
3.71E+00	-1.49E+00
4.23E+00	-1.69E+00
4.71E+00	-1.95E+00
5.27E+00	-2.23E+00
5.75E+00	-2.51E+00
6.62E+00	-2.89E+00
7.42E+00	-3.25E+00
8.23E+00	-3.55E+00
9.09E+00	-3.78E+00
9.94E+00	-4.02E+00
1.07E+01	-4.25E+00
1.16E+01	-4.49E+00
1.24E+01	-4.69E+00
1.32E+01	-4.95E+00
1.41E+01	-5.08E+00
1.48E+01	-5.23E+00
