# Supplementary material for: Modeling Static Behavior of Rockfill Materials Based on Generalized Plasticity Model
Source: Hindawi journal article supplement (doi:10.1155/2019/2371709), 2019-01-01
Supplement: f1 [file 2371709.f1.zip › 2371709.f1/Experiment of Xiao et al/0.189/400-E1-Q.txt]

1.61E-01	1.20E+00
3.66E-01	1.58E+00
5.21E-01	1.77E+00
6.31E-01	1.85E+00
8.26E-01	1.90E+00
1.04E+00	1.94E+00
1.28E+00	1.96E+00
1.58E+00	1.97E+00
1.95E+00	1.99E+00
2.34E+00	2.01E+00
2.77E+00	2.02E+00
2.98E+00	2.02E+00
3.31E+00	2.02E+00
3.82E+00	2.02E+00
4.27E+00	2.02E+00
4.81E+00	2.01E+00
5.29E+00	1.99E+00
5.76E+00	1.99E+00
6.58E+00	1.97E+00
7.42E+00	1.96E+00
8.23E+00	1.95E+00
9.01E+00	1.94E+00
9.87E+00	1.93E+00
1.07E+01	1.92E+00
1.15E+01	1.90E+00
1.23E+01	1.89E+00
1.31E+01	1.87E+00
1.40E+01	1.87E+00
1.48E+01	1.85E+00
