# Supplementary material for: Modeling Static Behavior of Rockfill Materials Based on Generalized Plasticity Model
Source: Hindawi journal article supplement (doi:10.1155/2019/2371709), 2019-01-01
Supplement: f1 [file 2371709.f1.zip › 2371709.f1/Experiment of Xiao et al/0.189/800-E1-EV.txt]

2.12E-02	1.54E-02
1.26E-01	1.23E-01
2.55E-01	1.54E-01
3.83E-01	1.85E-01
4.90E-01	2.15E-01
6.61E-01	2.62E-01
8.33E-01	2.77E-01
9.61E-01	2.92E-01
1.13E+00	2.92E-01
1.28E+00	2.92E-01
1.46E+00	3.08E-01
1.67E+00	2.92E-01
1.93E+00	2.92E-01
2.30E+00	2.62E-01
2.62E+00	2.15E-01
2.92E+00	1.54E-01
3.29E+00	9.23E-02
3.74E+00	-1.54E-02
4.24E+00	-1.38E-01
4.76E+00	-2.46E-01
5.28E+00	-3.54E-01
5.73E+00	-4.62E-01
6.57E+00	-6.46E-01
7.37E+00	-8.00E-01
8.21E+00	-9.08E-01
9.03E+00	-1.06E+00
9.83E+00	-1.17E+00
1.07E+01	-1.28E+00
1.15E+01	-1.35E+00
1.23E+01	-1.42E+00
1.31E+01	-1.49E+00
1.39E+01	-1.52E+00
1.48E+01	-1.62E+00
