# Supplementary material for: Modeling Static Behavior of Rockfill Materials Based on Generalized Plasticity Model
Source: Hindawi journal article supplement (doi:10.1155/2019/2371709), 2019-01-01
Supplement: f1 [file 2371709.f1.zip › 2371709.f1/Experiment of Xiao et al/0.189/800-E1-Q.txt]

1.57E-01	1.02E+00
3.81E-01	1.37E+00
4.93E-01	1.51E+00
6.45E-01	1.57E+00
8.19E-01	1.63E+00
1.01E+00	1.67E+00
1.19E+00	1.71E+00
1.38E+00	1.74E+00
1.62E+00	1.76E+00
2.01E+00	1.78E+00
2.31E+00	1.80E+00
2.65E+00	1.81E+00
3.02E+00	1.81E+00
3.30E+00	1.81E+00
3.77E+00	1.81E+00
4.27E+00	1.81E+00
4.81E+00	1.81E+00
5.28E+00	1.81E+00
5.78E+00	1.81E+00
6.62E+00	1.80E+00
7.43E+00	1.80E+00
8.27E+00	1.80E+00
9.09E+00	1.78E+00
9.84E+00	1.78E+00
1.06E+01	1.78E+00
1.15E+01	1.78E+00
1.24E+01	1.77E+00
1.31E+01	1.76E+00
1.40E+01	1.75E+00
1.48E+01	1.74E+00
