# Supplementary material for: Modeling Static Behavior of Rockfill Materials Based on Generalized Plasticity Model
Source: Hindawi journal article supplement (doi:10.1155/2019/2371709), 2019-01-01
Supplement: f1 [file 2371709.f1.zip › 2371709.f1/Experiment of Xiao et al/0.189/1600-E1-EV.txt]

1.99E-02	7.69E-02
4.00E-02	1.38E-01
1.47E-01	1.69E-01
2.96E-01	2.46E-01
4.44E-01	3.38E-01
5.51E-01	3.69E-01
7.22E-01	4.46E-01
9.14E-01	5.08E-01
1.02E+00	5.69E-01
1.17E+00	6.00E-01
1.34E+00	6.46E-01
1.51E+00	7.08E-01
1.66E+00	7.54E-01
1.90E+00	8.00E-01
2.28E+00	8.62E-01
2.62E+00	9.38E-01
2.93E+00	9.69E-01
3.35E+00	1.02E+00
3.74E+00	1.09E+00
4.21E+00	1.12E+00
4.73E+00	1.15E+00
5.24E+00	1.22E+00
5.65E+00	1.22E+00
6.55E+00	1.31E+00
7.39E+00	1.31E+00
8.17E+00	1.29E+00
8.98E+00	1.31E+00
9.78E+00	1.35E+00
1.06E+01	1.35E+00
1.15E+01	1.35E+00
1.23E+01	1.38E+00
1.31E+01	1.38E+00
1.39E+01	1.38E+00
1.47E+01	1.40E+00
