# Supplementary material for: Modeling Static Behavior of Rockfill Materials Based on Generalized Plasticity Model
Source: Hindawi journal article supplement (doi:10.1155/2019/2371709), 2019-01-01
Supplement: f1 [file 2371709.f1.zip › 2371709.f1/Experiment of Xiao et al/0.189/1600-E1-Q.txt]

1.50E-01	7.60E-01
3.07E-01	9.92E-01
4.83E-01	1.13E+00
7.00E-01	1.21E+00
8.30E-01	1.25E+00
9.61E-01	1.31E+00
1.16E+00	1.35E+00
1.33E+00	1.39E+00
1.57E+00	1.42E+00
1.76E+00	1.45E+00
2.00E+00	1.46E+00
2.34E+00	1.51E+00
2.67E+00	1.52E+00
2.99E+00	1.55E+00
3.34E+00	1.57E+00
3.81E+00	1.58E+00
4.31E+00	1.60E+00
4.78E+00	1.60E+00
5.25E+00	1.62E+00
5.81E+00	1.63E+00
6.57E+00	1.64E+00
7.43E+00	1.64E+00
8.27E+00	1.64E+00
9.09E+00	1.64E+00
9.88E+00	1.64E+00
1.07E+01	1.65E+00
1.15E+01	1.64E+00
1.23E+01	1.64E+00
1.31E+01	1.64E+00
1.40E+01	1.64E+00
1.48E+01	1.64E+00
