# Supplementary material for: Modeling Static Behavior of Rockfill Materials Based on Generalized Plasticity Model
Source: Hindawi journal article supplement (doi:10.1155/2019/2371709), 2019-01-01
Supplement: f1 [file 2371709.f1.zip › 2371709.f1/Experiment of Xiao et al/0.244/400-E1-EV.txt]

4.33E-02	2.61E-02
1.95E-01	1.04E-01
3.47E-01	1.43E-01
4.77E-01	2.22E-01
6.07E-01	2.61E-01
7.80E-01	2.87E-01
8.88E-01	3.00E-01
1.06E+00	3.00E-01
1.23E+00	3.00E-01
1.34E+00	2.87E-01
1.55E+00	2.74E-01
1.75E+00	2.61E-01
1.99E+00	2.48E-01
2.22E+00	2.22E-01
2.63E+00	1.57E-01
2.95E+00	6.52E-02
3.23E+00	1.30E-02
3.66E+00	-7.83E-02
4.05E+00	-1.43E-01
4.35E+00	-2.22E-01
4.80E+00	-3.00E-01
5.31E+00	-4.70E-01
5.72E+00	-5.87E-01
6.57E+00	-7.96E-01
7.41E+00	-9.91E-01
8.25E+00	-1.12E+00
9.02E+00	-1.32E+00
9.83E+00	-1.49E+00
1.06E+01	-1.63E+00
1.16E+01	-1.81E+00
1.23E+01	-1.97E+00
1.31E+01	-2.11E+00
1.39E+01	-2.23E+00
1.47E+01	-2.32E+00
