# Supplementary material for: Modeling Static Behavior of Rockfill Materials Based on Generalized Plasticity Model
Source: Hindawi journal article supplement (doi:10.1155/2019/2371709), 2019-01-01
Supplement: f1 [file 2371709.f1.zip › 2371709.f1/Experiment of Xiao et al/0.244/400-E1-Q.txt]

3.65E-01	1.21E+00
4.98E-01	1.42E+00
6.93E-01	1.53E+00
8.67E-01	1.61E+00
1.04E+00	1.66E+00
1.21E+00	1.70E+00
1.36E+00	1.72E+00
1.56E+00	1.76E+00
1.73E+00	1.78E+00
2.01E+00	1.82E+00
2.37E+00	1.85E+00
2.65E+00	1.88E+00
3.02E+00	1.89E+00
3.41E+00	1.90E+00
3.86E+00	1.91E+00
4.31E+00	1.92E+00
4.78E+00	1.91E+00
5.30E+00	1.91E+00
5.81E+00	1.91E+00
6.61E+00	1.91E+00
7.44E+00	1.90E+00
8.22E+00	1.90E+00
9.01E+00	1.88E+00
9.87E+00	1.89E+00
1.07E+01	1.86E+00
1.17E+01	1.86E+00
1.23E+01	1.85E+00
1.32E+01	1.84E+00
1.40E+01	1.84E+00
1.48E+01	1.82E+00
