# Supplementary material for: Modeling Static Behavior of Rockfill Materials Based on Generalized Plasticity Model
Source: Hindawi journal article supplement (doi:10.1155/2019/2371709), 2019-01-01
Supplement: f1 [file 2371709.f1.zip › 2371709.f1/Experiment of Xiao et al/0.244/800-E1-EV.txt]

6.51E-02	3.91E-02
1.74E-01	1.30E-01
2.83E-01	1.70E-01
4.13E-01	2.22E-01
5.43E-01	2.74E-01
7.16E-01	3.26E-01
8.46E-01	3.52E-01
9.97E-01	4.04E-01
1.17E+00	4.57E-01
1.32E+00	4.96E-01
1.54E+00	4.96E-01
1.75E+00	5.35E-01
1.95E+00	5.48E-01
2.27E+00	5.48E-01
2.70E+00	5.48E-01
2.94E+00	5.87E-01
3.30E+00	5.35E-01
3.84E+00	5.22E-01
4.29E+00	4.96E-01
4.83E+00	4.57E-01
5.30E+00	4.17E-01
5.80E+00	3.65E-01
6.57E+00	2.74E-01
7.43E+00	2.09E-01
8.25E+00	1.57E-01
9.11E+00	7.83E-02
9.88E+00	2.61E-02
1.07E+01	-9.13E-02
1.17E+01	-1.57E-01
1.24E+01	-1.96E-01
1.31E+01	-2.61E-01
1.40E+01	-3.00E-01
1.48E+01	-3.26E-01
