# Supplementary material for: Modeling Static Behavior of Rockfill Materials Based on Generalized Plasticity Model
Source: Hindawi journal article supplement (doi:10.1155/2019/2371709), 2019-01-01
Supplement: f1 [file 2371709.f1.zip › 2371709.f1/Experiment of Xiao et al/0.244/800-E1-Q.txt]

2.29E-01	7.95E-01
4.28E-01	1.11E+00
5.60E-01	1.26E+00
6.69E-01	1.35E+00
8.63E-01	1.42E+00
9.93E-01	1.48E+00
1.23E+00	1.52E+00
1.38E+00	1.54E+00
1.60E+00	1.59E+00
1.73E+00	1.61E+00
2.01E+00	1.64E+00
2.37E+00	1.67E+00
2.74E+00	1.69E+00
2.99E+00	1.70E+00
3.36E+00	1.72E+00
3.85E+00	1.75E+00
4.31E+00	1.76E+00
4.82E+00	1.76E+00
5.34E+00	1.77E+00
5.81E+00	1.77E+00
6.63E+00	1.77E+00
7.49E+00	1.79E+00
8.26E+00	1.77E+00
9.12E+00	1.79E+00
9.93E+00	1.77E+00
1.07E+01	1.76E+00
1.17E+01	1.76E+00
1.23E+01	1.76E+00
1.32E+01	1.76E+00
1.40E+01	1.75E+00
1.48E+01	1.74E+00
