# Supplementary material for: Modeling Static Behavior of Rockfill Materials Based on Generalized Plasticity Model
Source: Hindawi journal article supplement (doi:10.1155/2019/2371709), 2019-01-01
Supplement: f1 [file 2371709.f1.zip › 2371709.f1/Experiment of Xiao et al/0.244/1600-E1-EV.txt]

6.51E-02	3.91E-02
1.31E-01	1.30E-01
2.40E-01	2.09E-01
3.28E-01	2.87E-01
4.37E-01	3.65E-01
6.32E-01	4.57E-01
7.63E-01	5.35E-01
9.58E-01	6.00E-01
1.09E+00	6.65E-01
1.26E+00	7.43E-01
1.52E+00	8.22E-01
1.76E+00	8.87E-01
1.98E+00	9.52E-01
2.34E+00	1.02E+00
2.69E+00	1.12E+00
2.99E+00	1.21E+00
3.32E+00	1.30E+00
3.81E+00	1.40E+00
4.40E+00	1.46E+00
4.87E+00	1.54E+00
5.30E+00	1.58E+00
5.80E+00	1.60E+00
6.66E+00	1.72E+00
7.48E+00	1.80E+00
8.28E+00	1.83E+00
9.14E+00	1.89E+00
9.96E+00	1.93E+00
1.08E+01	1.96E+00
1.16E+01	1.97E+00
1.24E+01	2.00E+00
1.32E+01	2.03E+00
1.40E+01	2.06E+00
1.49E+01	2.09E+00
