# Supplementary material for: Modeling Static Behavior of Rockfill Materials Based on Generalized Plasticity Model
Source: Hindawi journal article supplement (doi:10.1155/2019/2371709), 2019-01-01
Supplement: f1 [file 2371709.f1.zip › 2371709.f1/Experiment of Xiao et al/0.244/1600-E1-Q.txt]

2.03E-01	5.36E-01
3.57E-01	7.68E-01
5.10E-01	9.06E-01
6.63E-01	1.01E+00
8.79E-01	1.10E+00
1.03E+00	1.14E+00
1.20E+00	1.19E+00
1.38E+00	1.23E+00
1.50E+00	1.27E+00
1.74E+00	1.29E+00
2.06E+00	1.34E+00
2.39E+00	1.37E+00
2.71E+00	1.40E+00
3.01E+00	1.42E+00
3.31E+00	1.44E+00
3.81E+00	1.47E+00
4.30E+00	1.48E+00
4.77E+00	1.50E+00
5.31E+00	1.52E+00
5.83E+00	1.54E+00
6.64E+00	1.56E+00
7.50E+00	1.57E+00
8.30E+00	1.59E+00
9.09E+00	1.59E+00
9.95E+00	1.59E+00
1.07E+01	1.59E+00
1.16E+01	1.60E+00
1.23E+01	1.61E+00
1.32E+01	1.60E+00
1.41E+01	1.61E+00
1.48E+01	1.60E+00
