# Supplementary material for: Modeling Static Behavior of Rockfill Materials Based on Generalized Plasticity Model
Source: Hindawi journal article supplement (doi:10.1155/2019/2371709), 2019-01-01
Supplement: f1 [file 2371709.f1.zip › 2371709.f1/Experiment of Xiao et al/0.285/400-E1-EV.txt]

6.49E-02	3.09E-02
1.95E-01	1.08E-01
2.81E-01	1.70E-01
4.11E-01	2.32E-01
5.41E-01	3.09E-01
7.14E-01	3.86E-01
9.09E-01	4.02E-01
1.08E+00	4.48E-01
1.30E+00	4.63E-01
1.51E+00	4.79E-01
1.71E+00	4.94E-01
1.99E+00	5.25E-01
2.16E+00	5.25E-01
2.44E+00	5.25E-01
2.68E+00	4.94E-01
3.00E+00	4.63E-01
3.39E+00	3.71E-01
3.84E+00	2.93E-01
4.36E+00	1.85E-01
4.84E+00	9.27E-02
5.33E+00	0.00E+00
5.83E+00	-1.54E-01
6.67E+00	-3.71E-01
7.42E+00	-5.56E-01
8.31E+00	-7.41E-01
9.12E+00	-9.11E-01
9.97E+00	-1.05E+00
1.08E+01	-1.20E+00
1.16E+01	-1.31E+00
1.24E+01	-1.41E+00
1.32E+01	-1.51E+00
1.41E+01	-1.68E+00
1.49E+01	-1.79E+00
