# Supplementary material for: Modeling Static Behavior of Rockfill Materials Based on Generalized Plasticity Model
Source: Hindawi journal article supplement (doi:10.1155/2019/2371709), 2019-01-01
Supplement: f1 [file 2371709.f1.zip › 2371709.f1/Experiment of Xiao et al/0.285/400-E1-Q.txt]

3.01E-01	1.06E+00
5.17E-01	1.27E+00
7.11E-01	1.37E+00
8.40E-01	1.45E+00
1.03E+00	1.52E+00
1.10E+00	1.57E+00
1.31E+00	1.61E+00
1.57E+00	1.65E+00
2.00E+00	1.69E+00
2.35E+00	1.73E+00
2.69E+00	1.75E+00
3.01E+00	1.77E+00
3.42E+00	1.78E+00
3.83E+00	1.80E+00
4.37E+00	1.82E+00
4.82E+00	1.83E+00
5.30E+00	1.83E+00
5.81E+00	1.84E+00
6.63E+00	1.84E+00
7.49E+00	1.83E+00
8.31E+00	1.84E+00
9.11E+00	1.81E+00
1.00E+01	1.81E+00
1.08E+01	1.81E+00
1.16E+01	1.79E+00
1.24E+01	1.78E+00
1.33E+01	1.78E+00
1.41E+01	1.79E+00
1.49E+01	1.78E+00
