# Supplementary material for: Modeling Static Behavior of Rockfill Materials Based on Generalized Plasticity Model
Source: Hindawi journal article supplement (doi:10.1155/2019/2371709), 2019-01-01
Supplement: f1 [file 2371709.f1.zip › 2371709.f1/Experiment of Xiao et al/0.285/800-E1-EV.txt]

8.68E-02	9.27E-02
1.95E-01	1.85E-01
3.25E-01	2.47E-01
4.33E-01	3.40E-01
6.07E-01	4.48E-01
7.15E-01	5.25E-01
8.23E-01	5.71E-01
9.53E-01	6.18E-01
1.08E+00	6.80E-01
1.28E+00	7.26E-01
1.39E+00	7.57E-01
1.62E+00	7.88E-01
1.90E+00	8.34E-01
2.21E+00	8.65E-01
2.57E+00	9.27E-01
2.96E+00	9.58E-01
3.33E+00	1.02E+00
3.83E+00	1.03E+00
4.30E+00	1.02E+00
4.82E+00	1.10E+00
5.34E+00	1.11E+00
5.79E+00	1.08E+00
6.65E+00	1.07E+00
7.49E+00	1.07E+00
8.27E+00	1.03E+00
9.13E+00	1.02E+00
9.98E+00	1.00E+00
1.08E+01	9.58E-01
1.16E+01	9.27E-01
1.25E+01	9.11E-01
1.33E+01	9.11E-01
1.41E+01	8.49E-01
1.49E+01	8.49E-01
