# Supplementary material for: Modeling Static Behavior of Rockfill Materials Based on Generalized Plasticity Model
Source: Hindawi journal article supplement (doi:10.1155/2019/2371709), 2019-01-01
Supplement: f1 [file 2371709.f1.zip › 2371709.f1/Experiment of Xiao et al/0.285/800-E1-Q.txt]

1.94E-01	6.20E-01
3.44E-01	8.97E-01
5.17E-01	1.06E+00
6.67E-01	1.17E+00
8.40E-01	1.24E+00
1.03E+00	1.31E+00
1.18E+00	1.36E+00
1.40E+00	1.39E+00
1.53E+00	1.42E+00
1.70E+00	1.45E+00
2.00E+00	1.48E+00
2.33E+00	1.50E+00
2.65E+00	1.53E+00
3.01E+00	1.55E+00
3.32E+00	1.57E+00
3.83E+00	1.60E+00
4.31E+00	1.61E+00
4.82E+00	1.62E+00
5.28E+00	1.64E+00
5.79E+00	1.66E+00
6.65E+00	1.66E+00
7.45E+00	1.68E+00
8.31E+00	1.68E+00
9.11E+00	1.69E+00
9.88E+00	1.70E+00
1.08E+01	1.70E+00
1.15E+01	1.71E+00
1.24E+01	1.72E+00
1.33E+01	1.71E+00
1.41E+01	1.72E+00
1.49E+01	1.72E+00
