# Supplementary material for: Modeling Static Behavior of Rockfill Materials Based on Generalized Plasticity Model
Source: Hindawi journal article supplement (doi:10.1155/2019/2371709), 2019-01-01
Supplement: f1 [file 2371709.f1.zip › 2371709.f1/Experiment of Xiao et al/0.285/1600-E1-EV.txt]

0.000166662	0.030888031
0.151829116	0.138996139
0.282158829	0.293436293
0.433904614	0.416988417
0.607149801	0.525096525
0.802061054	0.648648649
0.953806839	0.772200772
1.083719897	0.849420849
1.300130552	0.957528958
1.516624538	1.081081081
1.77611733	1.173745174
1.992444654	1.266409266
2.252187439	1.405405405
2.490430821	1.55984556
2.814671815	1.652509653
3.074331269	1.776061776
3.355490125	1.884169884
3.788144774	2.069498069
4.371711897	2.223938224
4.80394989	2.332046332
5.344434877	2.501930502
5.819921669	2.625482625
6.662481598	2.77992278
7.505041527	2.934362934
8.325935391	3.073359073
9.146745924	3.196911197
9.989139191	3.32046332
10.85294853	3.413127413
11.6303436	3.49034749
12.47232021	3.536679537
13.29263076	3.567567568
14.13477403	3.644787645
14.97683398	3.706563707
