# Supplementary material for: Modeling Static Behavior of Rockfill Materials Based on Generalized Plasticity Model
Source: Hindawi journal article supplement (doi:10.1155/2019/2371709), 2019-01-01
Supplement: f1 [file 2371709.f1.zip › 2371709.f1/Experiment of Xiao et al/0.285/1600-E1-Q.txt]

1.72E-01	4.39E-01
3.23E-01	6.06E-01
5.38E-01	7.17E-01
6.24E-01	8.05E-01
8.18E-01	8.93E-01
9.69E-01	9.44E-01
1.18E+00	9.95E-01
1.36E+00	1.04E+00
1.49E+00	1.07E+00
1.64E+00	1.11E+00
2.02E+00	1.17E+00
2.35E+00	1.22E+00
2.67E+00	1.25E+00
3.01E+00	1.29E+00
3.34E+00	1.31E+00
3.83E+00	1.34E+00
4.31E+00	1.38E+00
4.84E+00	1.40E+00
5.34E+00	1.43E+00
5.83E+00	1.44E+00
6.65E+00	1.48E+00
7.51E+00	1.49E+00
8.25E+00	1.51E+00
9.15E+00	1.53E+00
9.97E+00	1.55E+00
1.08E+01	1.55E+00
1.16E+01	1.57E+00
1.25E+01	1.58E+00
1.33E+01	1.58E+00
1.41E+01	1.59E+00
1.50E+01	1.59E+00
