# Supplementary material for: Modeling Static Behavior of Rockfill Materials Based on Generalized Plasticity Model
Source: Hindawi journal article supplement (doi:10.1155/2019/2371709), 2019-01-01
Supplement: f1 [file 2371709.f1.zip › 2371709.f1/Experiment of Xiao et al/0.317/400-E1-EV.txt]

6.45E-02	0.00E+00
2.59E-01	1.08E-01
4.32E-01	2.16E-01
6.05E-01	2.63E-01
7.99E-01	3.40E-01
1.02E+00	4.17E-01
1.30E+00	4.94E-01
1.47E+00	5.25E-01
1.68E+00	5.71E-01
1.94E+00	6.02E-01
2.22E+00	6.18E-01
2.59E+00	6.18E-01
2.97E+00	6.18E-01
3.40E+00	6.49E-01
3.88E+00	6.80E-01
4.31E+00	6.18E-01
4.80E+00	6.02E-01
5.34E+00	5.41E-01
5.77E+00	4.63E-01
6.67E+00	3.86E-01
7.49E+00	3.09E-01
8.28E+00	2.32E-01
9.18E+00	1.39E-01
1.00E+01	3.09E-02
1.08E+01	-4.63E-02
1.16E+01	-1.54E-01
1.24E+01	-2.32E-01
1.32E+01	-2.78E-01
1.41E+01	-3.86E-01
1.49E+01	-4.32E-01
