# Supplementary material for: Modeling Static Behavior of Rockfill Materials Based on Generalized Plasticity Model
Source: Hindawi journal article supplement (doi:10.1155/2019/2371709), 2019-01-01
Supplement: f1 [file 2371709.f1.zip › 2371709.f1/Experiment of Xiao et al/0.317/400-E1-Q.txt]

2.04E-01	5.88E-01
3.17E-01	8.57E-01
5.34E-01	1.01E+00
6.87E-01	1.14E+00
8.61E-01	1.22E+00
1.03E+00	1.30E+00
1.16E+00	1.35E+00
1.36E+00	1.40E+00
1.53E+00	1.43E+00
1.73E+00	1.46E+00
2.01E+00	1.51E+00
2.37E+00	1.54E+00
2.67E+00	1.58E+00
3.06E+00	1.61E+00
3.34E+00	1.63E+00
3.84E+00	1.66E+00
4.31E+00	1.68E+00
4.85E+00	1.70E+00
5.34E+00	1.71E+00
5.82E+00	1.72E+00
6.68E+00	1.75E+00
7.49E+00	1.76E+00
8.35E+00	1.76E+00
9.13E+00	1.75E+00
9.92E+00	1.75E+00
1.07E+01	1.75E+00
1.17E+01	1.76E+00
1.24E+01	1.75E+00
1.33E+01	1.75E+00
1.42E+01	1.75E+00
1.49E+01	1.75E+00
