# Supplementary material for: Modeling Static Behavior of Rockfill Materials Based on Generalized Plasticity Model
Source: Hindawi journal article supplement (doi:10.1155/2019/2371709), 2019-01-01
Supplement: f1 [file 2371709.f1.zip › 2371709.f1/Experiment of Xiao et al/0.317/800-E1-EV.txt]

6.45E-02	0.00E+00
1.74E-01	1.85E-01
3.25E-01	2.63E-01
4.34E-01	3.86E-01
6.07E-01	4.63E-01
8.02E-01	6.02E-01
9.75E-01	6.80E-01
1.08E+00	7.26E-01
1.26E+00	8.34E-01
1.47E+00	9.27E-01
1.69E+00	1.03E+00
2.06E+00	1.14E+00
2.34E+00	1.24E+00
2.70E+00	1.37E+00
3.07E+00	1.45E+00
3.33E+00	1.53E+00
3.91E+00	1.67E+00
4.34E+00	1.75E+00
4.88E+00	1.84E+00
5.42E+00	1.90E+00
5.81E+00	1.98E+00
6.65E+00	2.05E+00
7.46E+00	2.10E+00
8.26E+00	2.16E+00
9.10E+00	2.21E+00
9.94E+00	2.22E+00
1.07E+01	2.25E+00
1.16E+01	2.25E+00
1.24E+01	2.29E+00
1.32E+01	2.30E+00
1.41E+01	2.32E+00
1.49E+01	2.32E+00
