# Supplementary material for: Modeling Static Behavior of Rockfill Materials Based on Generalized Plasticity Model
Source: Hindawi journal article supplement (doi:10.1155/2019/2371709), 2019-01-01
Supplement: f1 [file 2371709.f1.zip › 2371709.f1/Experiment of Xiao et al/0.317/800-E1-Q.txt]

2.02E-01	4.49E-01
3.77E-01	6.58E-01
5.52E-01	8.02E-01
6.83E-01	9.08E-01
8.56E-01	9.87E-01
1.03E+00	1.06E+00
1.16E+00	1.13E+00
1.38E+00	1.18E+00
1.51E+00	1.21E+00
1.70E+00	1.25E+00
2.00E+00	1.30E+00
2.35E+00	1.35E+00
2.69E+00	1.39E+00
3.04E+00	1.43E+00
3.36E+00	1.46E+00
3.85E+00	1.49E+00
4.31E+00	1.52E+00
4.84E+00	1.54E+00
5.34E+00	1.57E+00
5.79E+00	1.58E+00
6.63E+00	1.61E+00
7.45E+00	1.63E+00
8.29E+00	1.65E+00
9.08E+00	1.66E+00
9.97E+00	1.68E+00
1.08E+01	1.69E+00
1.16E+01	1.70E+00
1.24E+01	1.70E+00
1.32E+01	1.71E+00
1.41E+01	1.71E+00
1.49E+01	1.72E+00
