# Supplementary material for: Modeling Static Behavior of Rockfill Materials Based on Generalized Plasticity Model
Source: Hindawi journal article supplement (doi:10.1155/2019/2371709), 2019-01-01
Supplement: f1 [file 2371709.f1.zip › 2371709.f1/Experiment of Xiao et al/0.317/1600-E1-EV.txt]

6.52E-02	6.18E-02
1.74E-01	2.01E-01
2.40E-01	2.78E-01
3.69E-01	3.55E-01
5.00E-01	4.63E-01
6.30E-01	5.87E-01
8.25E-01	7.10E-01
1.02E+00	8.19E-01
1.21E+00	9.42E-01
1.39E+00	1.10E+00
1.67E+00	1.25E+00
1.86E+00	1.36E+00
2.08E+00	1.48E+00
2.45E+00	1.68E+00
2.69E+00	1.87E+00
3.10E+00	2.05E+00
3.40E+00	2.22E+00
3.92E+00	2.44E+00
4.39E+00	2.63E+00
4.95E+00	2.80E+00
5.39E+00	3.00E+00
5.88E+00	3.15E+00
6.72E+00	3.40E+00
7.52E+00	3.60E+00
8.36E+00	3.78E+00
9.20E+00	3.98E+00
1.01E+01	4.11E+00
1.09E+01	4.29E+00
1.17E+01	4.45E+00
1.26E+01	4.57E+00
1.33E+01	4.65E+00
1.42E+01	4.76E+00
1.50E+01	4.86E+00
