# Supplementary material for: Modeling Static Behavior of Rockfill Materials Based on Generalized Plasticity Model
Source: Hindawi journal article supplement (doi:10.1155/2019/2371709), 2019-01-01
Supplement: f1 [file 2371709.f1.zip › 2371709.f1/Experiment of Xiao et al/0.317/1600-E1-Q.txt]

2.00E-01	3.34E-01
3.74E-01	4.63E-01
5.48E-01	5.93E-01
6.79E-01	6.72E-01
8.30E-01	7.27E-01
1.05E+00	7.83E-01
1.20E+00	8.34E-01
1.33E+00	8.85E-01
1.52E+00	9.31E-01
1.69E+00	9.68E-01
2.00E+00	1.03E+00
2.36E+00	1.10E+00
2.69E+00	1.15E+00
3.03E+00	1.19E+00
3.36E+00	1.23E+00
3.87E+00	1.26E+00
4.37E+00	1.31E+00
4.84E+00	1.33E+00
5.34E+00	1.37E+00
5.83E+00	1.40E+00
6.67E+00	1.43E+00
7.51E+00	1.46E+00
8.35E+00	1.49E+00
9.15E+00	1.51E+00
1.00E+01	1.53E+00
1.08E+01	1.54E+00
1.16E+01	1.56E+00
1.25E+01	1.57E+00
1.33E+01	1.57E+00
1.42E+01	1.58E+00
1.50E+01	1.58E+00
