# Supplementary material for: Modeling Static Behavior of Rockfill Materials Based on Generalized Plasticity Model
Source: Hindawi journal article supplement (doi:10.1155/2019/2371709), 2019-01-01
Supplement: f1 [file 2371709.f1.zip › 2371709.f1/Monitoring results of Sanbanxi Rockfill Dam.xlsx]

## Sheet: Sheet1
	EC-1-1/EC-1-2				EC-2-1/EC-2-2				EC-3-1/EC-3-2				EC-4-1/EC-4-2
	date	σx	σy		date	σx	σy		date	σx	σy		date	σx	σy
		kPa	kPa			kPa	kPa			kPa	kPa			kPa	kPa
	2003-08-29	124.783	267.391		2003-09-29	208.453	495.546		2003-06-27	144.497	443.188		2003-04-05	108.055	208.745
	2003-09-16	199.326	469.473		2004-06-21	390.973	1062.55		2003-09-22	203.814	632.184		2003-12-20	264.799	534.853
	2003-09-20	202.347	521.548		2005-02-25	561.385	1473.33		2004-03-26	331.604	977.68		2004-03-26	353.077	691.446
	2003-09-24	205.37	567.115		2005-10-02	712.022	1825.44		2004-10-12	468.55	1290.68		2004-09-08	465.692	919.735
	2003-10-12	217.538	606.217		2006-04-05	839.865	2066.81		2005-04-01	585.742	1505.98		2005-01-16	534.175	1056.71
	2003-11-04	232.755	638.826		2006-09-21	955.52	2308.13		2005-07-20	661.833	1662.51		2005-02-20	550.906	1108.85
	2003-12-13	260.153	684.506		2006-10-22	976.818	2366.8		2005-08-12	677.05	1695.12		2005-03-01	564.593	1154.47
	2004-01-11	279.957	684.598		2006-11-09	988.955	2464.47		2005-09-12	698.328	1792.83		2005-04-29	605.675	1252.27
	2004-02-10	299.764	678.183		2007-02-26	1063.54	2581.95		2005-12-18	765.314	1877.74		2005-06-26	645.244	1330.55
	2004-02-25	310.415	704.263		2007-04-19	1100.05	2686.24		2006-01-10	780.502	1968.92		2005-08-12	677.219	1363.23
	2004-03-04	316.492	736.829		2007-09-01	1191.36	2875.39		2006-03-27	833.778	2053.77		2005-08-16	680.259	1376.26
	2004-03-13	322.579	749.873		2007-10-16	1223.33	2914.58		2006-04-27	855.092	2079.9		2005-08-23	684.822	1389.3
	2004-04-07	339.33	762.966		2007-10-25	1229.42	2921.12		2006-05-08	862.672	2151.52		2005-09-25	707.647	1441.47
	2004-05-01	356.067	802.089		2007-11-01	1233.98	2934.15		2006-06-13	887.027	2190.67		2005-11-05	735.055	1467.62
	2004-06-06	380.451	782.68		2007-11-08	1238.55	2947.19						2005-12-02	753.322	1493.74
	2004-06-16	391.378	834.726		2007-11-14	1243.11	2960.23						2005-12-11	759.409	1506.78
	2004-07-06	401.739	860.87		2007-11-21	1247.67	2973.26
