# Supplementary material for: Modeling Static Behavior of Rockfill Materials Based on Generalized Plasticity Model
Source: Hindawi journal article supplement (doi:10.1155/2019/2371709), 2019-01-01
Supplement: f1 [file 2371709.f1.zip › 2371709.f1/Rumei rockfill materials test-3200kPa.xlsx]

## Sheet: E1-Q-EV
3200		3200
εa	σ1-σ3	εa	εv
%	kPa	%	%
0	0	0	0
0.0585115	112.9	0.0585115	0.0167517
0.117605	215.1	0.117605	0.0488765
0.175243	400.218	0.175243	0.0881491
0.234483	643.995	0.234483	0.134065
0.293576	770.151	0.293576	0.176187
0.351942	977.034	0.351942	0.230074
0.440729	1142.37	0.440729	0.309765
0.499095	1275.21	0.499095	0.359097
0.557606	1438.63	0.557606	0.416019
0.645956	1667.03	0.645956	0.497984
0.733577	1880.42	0.733577	0.578814
0.821927	2077.88	0.821927	0.657746
0.909549	2280.82	0.909549	0.738574
0.998189	2478.69	0.998189	0.81371
1.08552	2665.95	1.08552	0.891505
1.17387	2853.41	1.17387	0.968157
1.26178	3029.54	1.26178	1.04216
1.34984	3221.45	1.34984	1.11691
1.43775	3408.59	1.43775	1.18826
1.55463	3652.39	1.55463	1.28389
1.67224	3896.82	1.67224	1.37686
1.7897	4134.4	1.7897	1.46717
1.90701	4365.85	1.90701	1.55787
2.05373	4649.21	2.05373	1.66792
2.20044	4923.18	2.20044	1.77265
2.34759	5204.35	2.34759	1.87701
2.49373	5476.63	2.49373	1.97492
2.6697	5791.66	2.6697	2.08458
2.84567	6072.76	2.84567	2.19425
3.02193	6374.07	3.02193	2.30013
3.22716	6710.8	3.22716	2.41663
3.43268	7038.97	3.43268	2.52668
3.63761	7365.84	3.63761	2.63521
3.84197	7682.3	3.84197	2.73235
4.07397	8028.85	4.07397	2.84848
4.30584	8381.75	4.30584	2.94296
4.53843	8699.92	4.53843	3.04884
4.76985	8986.71	4.76985	3.13384
5.00215	9280.34	5.00215	3.2215
5.26254	9577.37	5.26254	3.31068
5.52395	9863.62	5.52395	3.39227
5.78507	10091.4	5.78507	3.46437
6.04575	10350.7	6.04575	3.5266
6.30687	10566.4	6.30687	3.58732
6.59681	10763.9	6.59681	3.63627
6.88675	10920	6.88675	3.68219
7.17625	11060.9	7.17625	3.7171
7.46691	11199.2	7.46691	3.74632
7.75656	11308.6	7.75656	3.77061
8.07532	11399	8.07532	3.79413
8.39451	11474.8	8.39451	3.81159
8.71356	11551.9	8.71356	3.82525
9.03275	11590.9	9.03275	3.83512
9.35195	11616.1	9.35195	3.84043
9.69952	11632.4	9.69952	3.84461
10.0475	11635.5	10.0475	3.84195
10.3951	11645.5	10.3951	3.83664
10.7431	11617.3	10.7431	3.82715
11.0923	11591.9	11.0923	3.81653
11.4716	11525.3	11.4716	3.80666
11.8506	11487	11.8506	3.79034
12.2004	11449.6	12.2004	3.77554
12.5506	11427.8	12.5506	3.76226
12.9011	11406.5	12.9011	3.74936
13.0092	11407	13.0092	3.75011
13.5617	11349.4	13.5617	3.72241
13.7374	11329.9	13.7374	3.72165
