# Supplementary material for: Modeling Static Behavior of Rockfill Materials Based on Generalized Plasticity Model
Source: Hindawi journal article supplement (doi:10.1155/2019/2371709), 2019-01-01
Supplement: f1 [file 2371709.f1.zip › 2371709.f1/Sanbanxi-test.xlsx]

## Sheet: E1-Q
400kPa			800kPa			1200kPa
εa	σ1-σ3
%	MPa
0	0		0	0		0	0
0.269	0.85		0.587	1.67		0.301	1.1
0.587	1.47		1.14	2.45		0.587	1.81
1.17	1.95		1.73	2.77		0.872	2.42
1.73	2.34		2.3	3.05		1.46	3.34
2.28	2.4		2.87	3.24		2.03	3.75
2.89	2.44		3.46	3.3		2.58	4.02
3.44	2.5		4.03	3.46		3.2	4.35
4.03	2.49		4.6	3.6		3.74	4.51
4.58	2.46		5.15	3.71		4.33	4.66
5.17	2.43		5.74	3.78		4.9	4.75
5.72	2.41		6.29	3.79		5.47	4.86
6.28	2.4		6.88	3.81		6.04	4.94
6.88	2.38		7.45	3.84		6.63	5.03
			8.01	3.87		7.18	5.09
			8.61	3.86		7.77	5.15
			9.18	3.88		8.34	5.21
						8.91	5.22
						9.5	5.2
						10.1	5.2
						10.7	5.2
						11.2	5.18

## Sheet: E1-EV
400kPa			800kPa			1200kPa
εa	εv
%	%
0	0		0	0		0	0
0.274	0.0342		0.291	0.0752		0.274	0.0376
0.564	0.0752		0.565	0.202		0.565	0.126
1.13	0.161		1.16	0.284		1.15	0.202
1.71	0.202		1.73	0.41		1.69	0.325
2.42	0.274		2.28	0.53		2.31	0.53
2.87	0.301		2.86	0.653		2.89	0.735
3.42	0.345		3.44	0.776		3.42	0.858
4	0.386		4.02	0.896		4	0.974
4.59	0.362		4.58	0.981		4.58	1.23
5.14	0.342		5.16	1.03		5.18	1.32
5.72	0.294		5.73	1.06		5.75	1.48
6.3	0.243		6.31	1.11		6.33	1.54
6.86	0.191		6.89	1.15		6.76	1.6
			7.45	1.19		7.47	1.69
			8.02	1.21		8.05	1.75
			8.63	1.23		8.63	1.77
			9.21	1.22		9.2	1.81
			9.77	1.23		9.76	1.81
						10.4	1.81
						10.9	1.8
						11.5	1.78
