# Supplementary material for: Modeling Static Behavior of Rockfill Materials Based on Generalized Plasticity Model
Source: Hindawi journal article supplement (doi:10.1155/2019/2371709), 2019-01-01
Supplement: f1 [file 2371709.f1.zip › 2371709.f1/Sandstone rockfill materials test.xlsx]

## Sheet: E1-Q
400			800			1200			2000			3300
εa	σ1-σ3
%	kPa
0	0		0	0		0	0		0	0		0	0
0.111614	138.012		0.11158	172.645		0.11158	172.645		0.0954322	345.879		0.0635869	242.13
0.191314	310.805		0.223194	379.921		0.19121	414.701		0.207012	587.788		0.127208	518.893
0.286988	483.523		0.334773	621.83		0.28685	622.052		0.302582	864.403		0.206804	795.582
0.398602	690.8		0.462362	829.034		0.398429	863.961		0.398187	1106.39		0.270391	1106.98
0.526225	863.371		0.60596	1001.53		0.510009	1105.87		0.509767	1348.3		0.349987	1383.66
0.669858	1001.24		0.749523	1208.66		0.621623	1313.15		0.605337	1624.91		0.413678	1591.16
0.797516	1139.17		0.877146	1381.23		0.733237	1520.42		0.700873	1936.16		0.557137	1902.19
1.00505	1276.74		1.06863	1588.14		0.844851	1727.7		0.860342	2212.48		0.636699	2213.51
1.18066	1379.83		1.21227	1726		1.05224	2003.8		1.03578	2488.72		0.780123	2559.17
1.30839	1448.5		1.35586	1898.5		1.17983	2211		1.2271	2868.79		0.955463	2939.31
1.51595	1551.44		1.56332	2105.33		1.37139	2348.65		1.35465	3110.63		1.11483	3319.53
1.67563	1619.97		1.70696	2243.2		1.49898	2555.85		1.56201	3421.36		1.32205	3768.79
1.93108	1757.32		1.94637	2449.89		1.65848	2797.54		1.70554	3663.12		1.46544	4149.08
2.12267	1860.33		2.18585	2587.31		1.94571	3107.9		1.92884	4008.41		1.65679	4494.51
2.41008	1997.53		2.44133	2690.03		2.16915	3314.66		2.18398	4457.45		1.8481	4874.58
2.6656	2065.61		2.69672	2896.64		2.42453	3521.27		2.4553	4698.62		2.11908	5462.08
2.92116	2099.07		2.93627	2964.8		2.67985	3797.15		2.67867	4974.64		2.37419	5945.75
3.20853	2270.9		3.30347	3170.89		2.96721	3968.98		2.93392	5319.79		2.66128	6394.64
3.54399	2269.35		3.5749	3308.17		3.25462	4106.18		3.12547	5457.43		2.91642	6843.68
3.87932	2406.33		3.9262	3445.07		3.60588	4277.72		3.44455	5871.54		3.20344	7361.83
4.1828	2439.56		4.24559	3547.49		3.89329	4414.92		3.79581	6043.08		3.57027	7948.88
4.56612	2507.05		4.58102	3580.58		4.26046	4655.65		4.17893	6318.37		3.9372	8432.04
4.8855	2609.47		4.94833	3682.78		4.59575	4827.26		4.46623	6559.46		4.28815	8915.26
5.23701	2538.59		5.21979	3785.42		4.91524	4825.79		4.81742	6800.27		4.65508	9398.42
5.52445	2641.16		5.57109	3922.33		5.23452	5032.11		5.10479	6972.1		5.02215	9743.04
5.87592	2604.9		5.90656	3920.78		5.61777	5168.86		5.45613	7074.37		5.35713	10226.3
6.17944	2603.5		6.2579	4023.05		5.92122	5236.73		5.75947	7246.13		5.75618	10536.2
6.56283	2601.73		6.56145	3987.02		6.25662	5304.44		6.11077	7383.04		6.09134	10846.3
6.85037	2600.4		6.89681	4089.37		6.56003	5406.94		6.47798	7589.13		6.45851	11087.1
7.20181	2598.78		7.24818	4157.01		6.9114	5474.58		6.78139	7691.63		6.82575	11258.5
7.55318	2666.42		7.55176	4086.34		7.21481	5577.07		7.10074	7828.68		7.17695	11499.3
7.8567	2665.02		7.88716	4154.06		7.58215	5644.64		7.43607	7965.66		7.54415	11705.4
			8.20665	4152.58		7.8856	5712.5		7.7715	7998.75		7.91146	11807.6
			8.52614	4151.11		8.23701	5745.51		8.12276	8170.28		8.26277	11944.5
			8.89355	4149.41		8.5565	5744.04		8.44215	8272.71		8.61403	12116.1
			9.19703	4182.64		8.89196	5742.49		8.77748	8409.69		8.98141	12149
			9.54851	4146.38		9.21149	5706.38		9.12899	8338.8		9.33275	12251.3
			9.86796	4179.54		9.54688	5774.1		9.40048	8406.81		9.70013	12284.2
			10.1875	4143.43		9.91433	5737.77		9.78387	8405.04		10.0675	12282.5
			10.5549	4141.74		10.2339	5701.66		10.1194	8334.22		10.435	12280.8
			10.8584	4174.97		10.5533	5734.82		10.4708	8401.87		10.8343	12279
						10.9048	5698.56		10.7743	8435.1		11.1378	12277.6
						11.1923	5697.24		11.0778	8433.7		11.5532	12275.7
						11.5278	5695.69		11.4292	8432.07		11.8888	12135.6
						11.9113	5590.02		11.7646	8465.16		12.2881	12168.4
						12.2148	5623.25		11.9564	8395.01		12.6076	12201.5
									12.1321	8428.83		13.007	12165
												13.3743	12198
												13.7099	12057.9
												13.9974	12091.2
												14.0933	12090.8

## Sheet: E1-EV
400			800			1200			2000			3300
εa	εv
%	%
0	0		0	0		0	0		0	0		0	0
0.0954401	0.046453		0.111347	0.102123		0.0795334	0.0575729		0.111347	0.0687283		0.04772	0.0686811
0.2386	0.102218		0.254507	0.191283		0.19088	0.124446		0.174973	0.113302		0.127253	0.13553
0.365854	0.180234		0.397667	0.280444		0.302227	0.213582		0.254507	0.16902		0.174973	0.180093
0.540827	0.269418		0.52492	0.380724		0.42948	0.324994		0.349947	0.235881		0.28632	0.258097
0.699894	0.336326		0.668081	0.492147		0.556734	0.414142		0.4772	0.336161		0.365854	0.336079
0.843054	0.425486		0.874867	0.614749		0.699894	0.514434		0.620361	0.447585		0.509014	0.458634
1.00212	0.536922		1.00212	0.726161		0.827147	0.581319		0.763521	0.559008		0.620361	0.558902
1.17709	0.614974		1.193	0.848752		1.01803	0.703909		0.938494	0.659324		0.763521	0.659194
1.32025	0.693002		1.36797	0.960199		1.20891	0.848764		1.193	0.848752		0.906681	0.781749
1.47932	0.793306		1.51113	1.0271		1.35207	0.949055		1.35207	0.960187		1.12937	0.915495
1.65429	0.849094		1.6702	1.11627		1.54295	1.06051		1.51113	1.11615		1.30435	1.03807
1.8929	0.938325		1.92471	1.18325		1.6702	1.18306		1.68611	1.20533		1.46341	1.14951
2.1474	1.0053		2.21103	1.31704		1.95652	1.31685		1.9088	1.36134		1.63839	1.29435
2.3701	1.07226		2.43372	1.42852		2.1474	1.42831		2.1474	1.51736		1.81336	1.39467
2.6087	1.0947		2.65642	1.50661		2.43372	1.55097		2.41782	1.69567		2.09968	1.56186
2.94274	1.10608		2.92683	1.56247		2.6087	1.65129		2.68823	1.78493		2.3701	1.7179
3.21315	1.13968		3.21315	1.62947		2.91092	1.77396		2.89502	1.90753		2.65642	1.90735
3.5631	1.13994		3.579	1.7188		3.22906	1.87438		3.11771	2.03014		2.91092	2.04112
3.91304	1.1402		3.89714	1.77469		3.61082	2.00825		3.43584	2.18622		3.19724	2.17491
4.21527	1.08476		4.21527	1.81945		3.88123	2.10863		3.78579	2.2978		3.51538	2.35326
4.50159	1.02931		4.5334	1.85309		4.21527	2.17567		4.11983	2.43163		3.91304	2.5094
4.89926	0.940556		4.91516	1.84224		4.58112	2.22047		4.43796	2.52092		4.24708	2.65436
5.18558	0.862846		5.2492	1.85362		4.91516	2.26524		4.772	2.63248		4.61294	2.79934
5.53552	0.751789		5.56734	1.83159		5.21739	2.29886		5.07423	2.67724		5.0106	2.92209
5.85366	0.640708		5.91729	1.86524		5.55143	2.34364		5.42418	2.77768		5.37646	3.05594
6.15589	0.507351		6.21951	1.84321		5.88547	2.34389		5.75822	2.82246		5.74231	3.16753
6.56946	0.396341		6.58537	1.82121		6.25133	2.34416		6.10817	2.85611		6.09226	3.25684
6.88759	0.274128		6.87169	1.75464		6.55355	2.33325		6.39449	2.91198		6.44221	3.33502
7.17391	0.0851012		7.20573	1.72149		6.88759	2.34463		6.79215	2.94567		6.80806	3.40208
7.49205	0.00741525		7.52386	1.66607		7.20573	2.33373		7.09438	2.9459		7.17391	3.49141
7.84199	-0.159301		7.82609	1.61063		7.52386	2.32284		7.44433	2.96842		7.52386	3.5362
			8.23966	1.55528		7.8579	2.30082		7.76246	2.99092		7.87381	3.61438
			8.49417	1.47755		8.23966	2.25658		8.11241	3.00231		8.23966	3.64804
			8.87593	1.41104		8.55779	2.23455		8.43054	2.99141		8.60551	3.70397
			9.20997	1.33337		8.84411	2.16797		8.76458	2.99166		8.97137	3.72651
			9.5122	1.27793		9.19406	2.10144		9.11453	3.01419		9.32131	3.74903
			9.90986	1.18917		9.5281	2.09056		9.44857	2.95877		9.73489	3.7716
			10.2121	1.156		9.87805	2.03516		9.7508	2.959		10.0371	3.77183
			10.5302	1.06718		10.2121	1.97975		10.0848	2.92585		10.4507	3.7944
			10.8643	1.01177		10.562	1.87982		10.4507	2.90386		10.8165	3.81693
						10.8643	1.83552		10.7847	2.90411		11.1665	3.80606
						11.2142	1.80239		11.071	2.84866		11.5323	3.81746
						11.5483	1.73584		11.421	2.81553		11.8823	3.81772
						11.8505	1.68041		11.7391	2.77123		12.2322	3.80685
						12.2004	1.61388		11.8982	2.78248		12.5822	3.81824
									12.0732	2.76035		12.9639	3.774
												13.3616	3.77429
												13.6797	3.77453
												13.982	3.75249
												14.0456	3.75254
