# Supplementary material for: Modeling Static Behavior of Rockfill Materials Based on Generalized Plasticity Model
Source: Hindawi journal article supplement (doi:10.1155/2019/2371709), 2019-01-01
Supplement: f1 [file 2371709.f1.zip › 2371709.f1/triaxial tests of granite rockfills by Jia 2012.xlsx]

## Sheet: 500kPa
εa	σ1-σ3		εa	εv
%	kPa		%	%
e=0.59			0.59
9.48026e-05	10.7759		0.241581	0.228005
0.177328	156.314		0.461201	0.274125
0.331904	226.412		0.856515	0.525323
0.486622	312.675		1.60322	0.686676
1.10459	555.354		2.26208	0.847764
1.47968	690.187		2.87701	0.872355
2.16316	879.01		3.53587	0.96526
2.71434	1030.07		4.041	0.966791
3.37521	1148.84		4.52416	0.877346
4.10216	1278.41		4.87555	0.878411
4.93898	1397.25		5.33675	0.857081
5.68787	1521.44		5.90776	0.813357
6.37031	1591.73		6.30307	0.746373
6.78848	1624.21		6.65447	0.656529
7.55866	1667.59		7.20351	0.635465
8.15274	1694.74		7.59883	0.591209
9.01085	1732.76		8.06003	0.524424
9.89104	1781.57		8.38946	0.411786
10.991	1808.9		8.87262	0.367796
11.915	1836.18		9.35578	0.301078
12.7952	1884.98		9.92679	0.257354
13.7631	1906.88		10.41	0.167909
14.951	1928.86		11.0249	0.0788633
			11.6398	0.0125449
			12.1669	-0.0767669
			12.8258	-0.120225
			13.3309	-0.186876
			13.7701	-0.231
			14.1874	-0.297917
e=0.5			0.5
0.15595	226.349		0.307467	0.18275
0.421208	377.306		0.483163	0.274191
0.885314	630.706		1.8448	0.982863
1.48148	894.929		2.43777	1.16648
1.83462	1035.14		2.9429	1.37255
2.40822	1234.7		3.42606	1.48765
2.93713	1353.43		4.26061	1.60382
3.44394	1461.37		5.11713	1.76551
4.30314	1623.31		6.01757	1.79096
5.22779	1726.02		7.02782	1.72584
5.95455	1834.04		7.84041	1.61467
6.967	1915.22		8.3675	1.50263
7.847	1942.47		9.02635	1.45917
8.35334	1996.53		9.77306	1.32507
8.99151	2034.48		10.8712	1.14658
9.78353	2061.7		11.6837	0.967223
10.7952	2056.68		12.8697	0.788999
11.763	2057.03		13.8141	0.587315
12.9288	2068.22		14.6266	0.476141
13.7865	2063.14
14.6662	2058.07
e=0.42			0.42
0.333753	436.542		0.219619	0.250666
0.599863	684.483		0.636896	0.50193
1.04288	1040.25		1.05417	0.730467
1.61776	1385.28		1.47145	0.981732
2.23568	1622.57		2.04246	1.30164
2.83095	1784.42		2.67936	1.55357
3.49163	1881.64		3.31625	1.8055
3.9764	1984.19		4.12884	1.96706
4.52716	2086.76		4.91947	2.12854
4.90144	2129.99		5.64422	2.19892
5.34184	2189.42		6.36896	2.22385
5.91407	2232.73		6.8082	2.20245
6.31011	2249.03		7.5549	2.22744
6.72781	2227.63		8.10395	2.09274
7.14598	2260.11		8.91654	2.02702
7.63009	2287.22		9.99268	1.9621
7.98186	2271.19		11.0029	1.80607
8.3997	2265.95		11.9253	1.69523
8.94979	2293.09		12.7379	1.58405
9.41186	2314.8		13.7482	1.45075
9.98361	2304.23		14.9341	1.27253
10.4454	2299.01
11.0611	2283.07
11.523	2283.23
12.3368	2283.53
12.7767	2283.68
13.2386	2283.85
13.7664	2278.65
14.2503	2289.6

## Sheet: 800kPa
εa	σ1-σ3		εa	εv
%	kPa		%	%
e=0.59			0.59
0.369399	226.206		0.23016	0.262825
0.532001	497.282		0.505046	0.349529
0.90114	678.313		0.826793	0.633829
1.06286	795.89		1.14779	0.786264
1.5476	1076.38		1.56049	0.982252
1.84783	1275.39		2.22459	1.15516
2.26287	1438.42		2.77436	1.32856
2.7701	1628.64		3.20931	1.41457
3.36915	1782.86		3.68998	1.50036
4.15235	1955.37		4.28536	1.65159
4.7971	2055.46		4.74291	1.69354
5.34966	2128.36		5.70426	1.86514
5.90239	2228.35		6.18481	1.92896
6.31676	2274		6.75744	2.10227
7.00752	2374.15		7.23787	2.14411
7.44495	2428.86		7.76389	2.16378
8.18167	2520.04		8.29017	2.2274
8.84891	2529.87		8.83906	2.24696
9.42438	2584.74		9.27338	2.22307
10.1608	2621.74		9.66209	2.22137
10.8513	2685.78		10.3023	2.21855
11.4497	2722.62		10.8059	2.30425
11.9329	2732.23		11.3091	2.34599
12.7153	2769.29		11.8584	2.43149
13.4058	2815.26		12.27	2.42968
13.912	2824.9		12.8416	2.42717
14.5561	2825.68		13.2306	2.46942
			13.665	2.46751
			14.2825	2.48677
e=0.5			0.5
0.185349	225.984		0.207295	0.262926
0.324581	433.827		0.57427	0.459115
0.555786	632.751		0.827296	0.721739
0.810206	867.82		1.28536	0.851593
1.01815	1021.57		1.9281	1.28833
1.29495	1148.31		2.2717	1.39671
1.64134	1374.46		2.63855	1.57092
2.10276	1600.75		3.09661	1.70077
2.33361	1736.47		3.64651	1.89616
2.63331	1845.18		4.24226	2.11332
3.11738	2008.3		4.86076	2.3084
3.55538	2162.32		5.38741	2.43796
4.24645	2316.65		6.18845	2.56631
4.89146	2461.9		7.03509	2.67247
5.4902	2561.94		8.01918	2.82199
6.25013	2689.27		8.70552	2.88491
7.07888	2780.56		9.23167	2.92655
7.99944	2835.84		9.73508	2.99028
8.73632	2954.11		10.3296	2.98766
9.26562	2981.84		11.0162	3.09453
9.74896	3018.54		11.6335	3.09182
10.37	3001.23		12.3195	3.08881
11.0147	3083.27		12.8456	3.13045
11.6359	3093.04		13.3715	3.12814
12.3032	3120.93		13.8748	3.16988
12.8324	3130.6		14.5151	3.16707
13.3385	3113.15
13.9596	3113.9
14.5117	3105.53
e=0.42			0.42
0.185816	307.249		0.162067	0.351036
0.533455	750.106		0.574773	0.547025
0.811712	1129.67		0.781691	0.743917
1.15836	1400.97		1.07994	0.91843
1.71244	1735.72		1.46941	1.04859
2.22003	1989.16		1.8595	1.28863
2.77332	2188.47		2.18062	1.46304
3.28066	2396.75		2.7314	1.81227
3.64959	2541.67		3.39625	2.11704
4.22521	2623.62		4.10658	2.37765
4.70892	2723.53		4.72507	2.57274
5.7684	2932.48		5.2521	2.76822
6.25174	2969.18		5.77889	2.91975
6.71218	3023.91		6.28268	3.04941
7.28806	3151.01		6.96964	3.22221
7.81747	3196.8		7.35885	3.30841
8.25474	3224.41		8.16002	3.45874
8.76114	3270.17		8.7775	3.478
9.31334	3279.86		9.41811	3.54112
9.72777	3334.54		10.2189	3.62551
10.3492	3380.43		10.8136	3.66685
10.7633	3380.93		11.4541	3.70799
11.3155	3390.63		11.9343	3.70588
11.8906	3382.29		12.666	3.70267
12.3508	3391.87		13.3748	3.69955
12.9029	3392.54		13.8778	3.69734
13.225	3392.92		14.5638	3.69433
13.7543	3411.62
14.3524	3412.34
14.8586	3412.95

## Sheet: 1200kPa
εa	σ1-σ3		εa	εv
%	kPa		%	%
e=0.59			0.59
0.249307	171.026		51.9391	0.326503
0.436288	331.992		95.5679	0.580566
0.560942	513.078		124.654	0.76199
0.831025	684.105		184.903	0.980309
1.03878	915.493		201.524	1.19758
1.24654	1066.4		249.307	1.52403
1.6205	1307.85		299.169	1.59752
2.07756	1498.99		340.72	1.88768
2.45152	1730.38		390.582	2.03346
2.97091	1931.59		440.443	2.25153
3.53186	2132.8		494.46	2.39741
3.84349	2233.4		548.476	2.57943
4.34211	2354.12		594.183	2.7974
4.81994	2484.91		635.734	2.94298
5.15235	2625.75		691.828	3.05277
5.7133	2706.24		747.922	3.23484
6.21191	2766.6		791.551	3.30818
6.8144	2947.69		843.49	3.49015
7.18837	2987.93		891.274	3.59974
7.77008	3098.59		941.136	3.63709
8.49723	3219.32		995.152	3.71068
9.43213	3360.16		1040.86	3.85636
10.0554	3430.58		1092.8	3.96604
10.7825	3511.07		1140.58	4.00334
11.5097	3601.61		1192.52	4.11302
12.2992	3651.91		1238.23	4.22256
13.2133	3702.21		1290.17	4.25995
13.9612	3782.7		1346.26	4.26131
14.8338	3822.94		1391.97	4.29855
			1443.91	4.26366
			1495.84	4.3372
e=0.5			0.5
0.311634	452.716		43.6288	0.470881
0.415512	603.622		66.482	0.652154
0.602493	804.829		95.5679	0.761289
0.747922	985.915		122.576	0.942663
0.976454	1197.18		149.584	1.08789
1.24654	1418.51		191.136	1.37805
1.51662	1680.08		226.454	1.55962
1.72438	1891.35		253.463	1.66871
1.99446	2022.13		303.324	1.88678
2.26454	2162.98		353.186	2.21328
2.53463	2374.25		390.582	2.28647
3.03324	2565.39		421.745	2.46794
3.55263	2867.2		479.917	2.68621
3.92659	2927.57		542.244	2.97687
4.30055	3108.65		583.795	3.08631
4.77839	3279.68		662.742	3.30508
5.48476	3501.01		714.681	3.48705
5.92105	3551.31		783.241	3.59714
6.5651	3601.61		858.033	3.85195
7.16759	3712.27		932.825	4.03448
7.81163	3802.82		1020.08	4.14501
8.66343	3933.6		1084.49	4.39958
9.34903	4044.27		1177.98	4.58255
10.1385	4134.81		1261.08	4.65684
10.8033	4164.99		1344.18	4.73114
11.6967	4255.53		1412.74	4.84122
12.59	4315.9		1481.3	4.98745
13.4211	4315.9
14.1066	4346.08
14.7715	4325.96
e=0.42			0.42
0.207756	432.596		27.0083	0.289757
0.644044	1136.82		47.7839	0.54327
0.934903	1619.72		62.3269	0.61591
1.20499	2032.19		87.2576	0.724944
1.55817	2364.19		112.188	1.0147
1.76593	2565.39		137.119	1.12374
2.09834	2816.9		164.127	1.30511
2.49307	3108.65		184.903	1.30561
2.88781	3420.52		203.601	1.55907
3.4072	3641.85		243.075	1.88533
3.94737	3833		301.247	2.39275
4.36288	4024.14		353.186	2.64701
4.92382	4144.87		390.582	2.82864
5.44321	4245.47		438.366	3.01051
5.94183	4336.02		479.917	3.30067
6.44044	4406.44		527.701	3.4464
6.89751	4446.68		571.33	3.66432
7.39612	4547.28		606.648	3.84589
7.87396	4547.28		687.673	4.02857
8.3518	4577.46		725.069	4.21019
8.85042	4577.46		785.319	4.39237
9.47368	4627.77		849.723	4.61079
9.90997	4617.71		951.524	4.86625
10.4917	4647.89		1003.46	5.04823
10.9488	4607.65		1082.41	5.23085
11.3643	4617.71		1157.2	5.34109
11.9044	4577.46		1229.92	5.52356
12.403	4577.46		1323.41	5.63425
12.8186	4617.71		1408.59	5.78088
13.4003	4567.4		1487.53	5.78278
13.8989	4607.65
14.3352	4597.59
14.813	4577.46
