# Supplementary material for: Modeling Static Behavior of Rockfill Materials Based on Generalized Plasticity Model
Source: Hindawi journal article supplement (doi:10.1155/2019/2371709), 2019-01-01
Supplement: f1 [file 2371709.f1.zip › 2371709.f1/Yang-constant P test.xlsx]

## Sheet: E1-Q
200kPa			700			1400			2000
εa	σ1-σ3		εa	σ1-σ3		εa	σ1-σ3		εa	σ1-σ3
%	kPa		%	kPa		%	kPa		%	kPa
0	0		0	0		0	0		0	0
0.0627306	59.0299		0.0498421	72.1315		0.0625404	72.1384		0.0743826	131.134
0.112668	118.046		0.08632	183.575		0.0738119	170.459		0.148099	301.586
0.200985	157.42		0.173306	314.708		0.147624	334.357		0.209689	432.706
0.289208	203.348		0.411625	518.022		0.209023	478.585		0.270992	583.488
0.390223	242.729		0.586738	701.638		0.320074	701.493		0.382233	793.287
0.541937	288.692		0.8135	826.294		0.49357	996.531		0.493189	1022.75
0.884506	308.542		1.02833	898.509		0.945477	1357.26		0.982145	1455.6
1.25247	328.406		1.16744	937.91		1.45056	1554.17		1.46031	1757.36
1.70961	328.656		1.38245	997.017		1.9689	1711.76		2.041	1993.63
2.19196	342.028		1.58496	1043.01		2.43693	1836.54		2.52097	2170.86
2.59821	348.804		1.77515	1062.77		2.96941	1895.82		3.01383	2334.99
3.04255	355.601		2.01594	1095.68		3.4508	1974.74		3.46992	2407.33
3.4235	355.809		2.44702	1141.79		3.97067	2027.46		3.98912	2505.93
3.80417	375.68		3.05597	1181.45		4.46495	2093.27		4.48274	2617.62
4.09632	369.285		3.60161	1207.97		4.99762	2139.44		4.97636	2729.32
4.62956	376.131		4.08377	1234.45		5.46698	2172.47		5.45747	2827.89
5.61984	389.781		4.47732	1241.22		6.01234	2218.65		5.96426	2906.82
6.78779	410.081		5.13735	1261.24		6.44332	2271.32		6.48394	2972.65
7.94353	397.604		5.5562	1274.58		6.96319	2324.03		6.92733	3044.99
9.28965	391.785		6.00083	1261.71		7.38157	2370.14		7.40901	3104.24
10.1528	411.919		6.47057	1268.52		8.09239	2390.19		7.95399	3176.64
			6.97822	1288.46		8.42226	2410.04		8.51158	3255.59
			7.48606	1295.29		8.9174	2416.86		8.95554	3288.61
			8.13339	1315.31		9.62851	2417.25		9.43789	3301.98
			9.25093	1309.37		10.5428	2417.75		10.0722	3341.65
			10.1909	1290.22		11.4825	2418.26		10.453	3354.97
									10.9608	3361.8

## Sheet: E1-EV
200kPa			700			1400			2000
εa	εv		εa	εv		εa	εv		εa	εv
%	%		%	%		%	%		%	%
0	0		0	0		0	0		0	0
0.10975	0.0225564		0.12275	0.112782		0.109896	0.157895		0.148678	0.225564
0.174315	0.0676692		0.251904	0.225564		0.239073	0.293233		0.252098	0.406015
0.251807	0.135338		0.484283	0.338346		0.471501	0.451128		0.471671	0.609023
0.393718	0.112782		0.703881	0.56391		0.794276	0.631579		0.704099	0.766917
0.522678	0.0451128		0.975018	0.721805		1.05249	0.766917		0.949382	0.879699
0.66454	-0.0225564		1.27196	0.879699		1.47861	1.06015		1.34967	1.15038
0.88375	-0.157895		1.58179	1.01504		2.05947	1.26316		2.07276	1.62406
1.23197	-0.315789		1.93032	1.15038		2.52425	1.51128		2.56338	1.89474
1.7091	-0.586466		2.52401	1.28571		2.98899	1.71429		3.05401	2.18797
2.26367	-0.834586		3.04019	1.33083		3.50517	1.7594		3.54465	2.4812
2.59898	-0.992481		3.72408	1.35338		3.957	1.96241		4.06105	2.72932
3.01162	-1.2406		4.16289	1.44361		4.53781	2.1203		4.53869	2.93233
3.35988	-1.35338		4.49835	1.42105		5.1186	2.25564		5.02925	3.15789
3.70808	-1.53383		4.89835	1.42105		5.54451	2.34586		5.53257	3.24812
4.08212	-1.66917		5.36294	1.48872		6.04778	2.39098		6.02321	3.54135
4.57218	-1.91729		5.96932	1.42105		6.57701	2.57143		6.44916	3.67669
5.59078	-2.61654		6.56279	1.35338		7.13202	2.72932		6.87519	3.8797
6.84157	-3.38346		7.04014	1.28571		7.68693	2.79699		7.3528	4.06015
7.97616	-4.21805		7.569	1.12782		8.3838	2.88722		7.9723	4.19549
9.31739	-4.87218		8.16231	0.902256		9.02908	3		8.61751	4.2406
10.1943	-5.30075		9.32321	0.541353		9.7	2.95489		9.09503	4.33083
			10.252	0.360902		10.5773	2.86466		9.57245	4.33083
						11.519	2.66165		10.166	4.35338
									10.5919	4.46617
									11.0823	4.46617
