# Supplementary material for: Modeling Static Behavior of Rockfill Materials Based on Generalized Plasticity Model
Source: Hindawi journal article supplement (doi:10.1155/2019/2371709), 2019-01-01
Supplement: f1 [file 2371709.f1.zip › 2371709.f1/Yang-constant stress ratio test.xlsx]

## Sheet: P-EV
3.5		2.5		2		1.5
εv	P
%	MPa
0	-0.0106721	0	-0.0106721	0	-0.0106721	0	-0.0106721
0.521341	0.2506	0.52079	0.33664	0.361872	0.154388	0.233807	0.153899
1.138	0.616247	0.935104	0.634592	0.766248	0.337579	0.520239	0.42268
1.69142	0.857369	1.29679	0.817619	1.16001	0.511169	0.881499	0.672628
2.1708	0.993046	1.7441	0.962733	1.56433	0.70392	1.13671	0.817007
2.63946	1.13824	2.11695	1.06932	1.91528	0.896466	1.40266	0.951867
3.19367	1.25508	2.53231	1.20475	2.3729	1.09898	1.70025	1.14421
3.673	1.40032	2.90503	1.33046	2.79856	1.29181	2.01943	1.29839
4.14159	1.55508	3.29892	1.48493	3.18153	1.48448	2.30648	1.47158
4.6633	1.74828	3.71446	1.59168	3.55383	1.67711	2.62554	1.64488
5.16342	1.97963	4.12969	1.74623	3.95821	1.8603	2.94454	1.82774
5.6317	2.18219	4.47028	1.89094	4.35148	2.11037	3.36989	2.06838
6.19586	2.41379	4.896	2.07421	4.75506	2.41784	3.795	2.34725
6.65298	2.69279	5.2894	2.30516	4.99899	2.65778	4.11363	2.58747
7.16359	2.95287	5.62993	2.45943	5.19017	2.80192	4.46367	2.92342
7.60974	3.27962	5.89587	2.59429	5.33866	2.94589
8.03484	3.55849	6.19371	2.74839	5.56155	3.13794
8.39555	3.89448	6.46972	2.97889	5.82713	3.33016
8.79864	4.27843	6.79909	3.2096
9.13789	4.63346	7.01155	3.36337
		7.12827	3.46898

## Sheet: Q-ES
3.5		2.5		2		1.5
εs	Q
%	MPa
0	0	0	0	0	0	0	0
0.694676	0.364831	0.150896	0.13502	0.150751	0.202457	0.0904795	0.107987
1.34414	0.662181	0.256465	0.256509	0.241172	0.337419	0.165753	0.256422
1.99372	0.905582	0.452631	0.432035	0.331535	0.499356	0.226053	0.337405
2.79438	1.20308	0.678975	0.634565	0.437046	0.64782	0.241026	0.404856
3.56511	1.35218	0.99609	0.810208	0.542615	0.769309	0.301356	0.472352
4.24508	1.52817	1.31329	0.945389	0.602915	0.850292	0.331389	0.566793
4.92496	1.74463	1.60029	1.06705	0.678305	0.944777	0.391689	0.647776
5.49906	1.93401	1.87205	1.24265	0.783874	1.06627	0.4369	0.715257
5.96731	2.13677	2.11374	1.3373	0.904533	1.20126	0.482111	0.782738
6.55636	2.40709	2.35538	1.45892	1.0101	1.32275	0.527321	0.850219
7.08493	2.67735	2.64229	1.62104	1.161	1.45777	0.587622	0.931202
7.58321	2.97455	2.85369	1.74263	1.34213	1.59282	0.632803	1.01217
8.21756	3.27189	3.08024	1.85075	1.49297	1.75481	0.693132	1.07967
8.79125	3.65009	3.30655	2.06677	1.64381	1.91681	0.753462	1.14716
9.39519	4.02832	3.54801	2.26931	1.76444	2.06528	0.813791	1.21466
9.87814	4.41992	3.80463	2.45839	1.90024	2.1868
10.4971	4.83863	4.06103	2.74187	2.03602	2.32181
10.9346	5.27065	4.21175	2.95781	2.12639	2.48374
11.4021	5.8106	4.31712	3.17372
11.7943	6.24258	4.48284	3.44363

## Sheet: EV-E1
3.5		2.5		2		1.5
ε1	εv
%	%
0.785663	0.439051	-0.0190475	-0.017047	-0.0190475	-0.017047	-0.0190475	-0.017047
2.32335	1.14564	0.409129	0.45765	0.289148	0.51465	0.152902	0.324012
3.3141	1.66111	0.955156	0.915443	0.510238	0.914914	0.254597	0.609847
4.25364	2.13842	1.36461	1.27784	0.680708	1.10559	0.424872	0.857669
5.10756	2.63467	1.89359	1.71656	0.884621	1.52488	0.57797	1.12452
5.91008	3.14991	2.21755	2.0598	1.12295	1.88707	0.679796	1.37226
6.64408	3.68412	2.62681	2.47934	1.36116	2.28736	0.76464	1.58188
7.327	4.14208	3.05312	2.91794	1.59942	2.66859	0.917672	1.86778
8.04395	4.65722	3.44539	3.29936	1.85454	3.12604	1.05353	2.1727
8.77808	5.15333	3.78627	3.69977	2.0757	3.50725	1.1724	2.43951
9.46081	5.66843	4.24693	4.10031	2.39933	3.94573	1.2741	2.72535
10.1949	6.16454	4.55371	4.46258	2.62094	4.19362	1.37612	2.91594
10.9975	6.67978	4.87734	4.90106	2.87671	4.46059	1.47781	3.20178
11.6973	7.1949	5.18419	5.24429	3.01276	4.70837	1.6138	3.46861
12.2267	7.50029	5.40587	5.47312	3.21739	4.91814	1.76663	3.81165
13.1317	8.09184	5.55916	5.68283	3.43907	5.14697	1.90229	4.17371
13.6951	8.47347	5.72963	5.87351	3.64357	5.39483	2.12351	4.53588
14.344	8.87424	6.00245	6.15955	3.7627	5.58545
14.8049	9.1986	6.2238	6.48362	3.93304	5.81423
		6.49649	6.80775
		6.64978	7.01746
		6.82019	7.22719

## Sheet: E3-E1
3.5		2.5		2		1.5
ε1	ε3
%	%
0	0.00872093	0	0.00872093	0	0.00872093	0	0.00872093
0.76841	-0.175256	0.341515	0.00834864	0.290288	0.0868929	0.170758	0.0608604
2.30523	-0.604257	0.973319	-0.0272238	0.495197	0.165158	0.341515	0.121721
3.32978	-0.823397	1.36606	-0.0450938	0.717182	0.225962	0.461046	0.173916
4.30309	-1.0512	1.84418	-0.054336	0.853789	0.304302	0.597652	0.252255
5.08858	-1.22648	2.16862	-0.0808524	1.10993	0.382511	0.751334	0.339297
5.89114	-1.36689	2.64674	-0.0552108	1.34899	0.46946	0.88794	0.45252
6.65955	-1.51598	3.05656	-0.0818204	1.58805	0.538967	1.00747	0.557041
7.34258	-1.60393	3.3127	-0.0820996	1.79296	0.608511	1.14408	0.644102
8.05977	-1.70065	3.63714	-0.0824533	2.10032	0.695385	1.31483	0.739846
8.75987	-1.79734	4.01281	-0.0741419	2.37353	0.747413	1.48559	0.826869
9.51121	-1.92897	4.26894	-0.0569792	2.62967	0.799459	1.6222	0.913929
10.2455	-2.05187	4.55923	-0.0485747	2.97118	0.83397	1.79296	1.00095
11.0139	-2.1748	4.8666	-0.0314679	3.19317	0.859891	1.94664	1.08799
11.7481	-2.28897	5.20811	-0.00567745	3.36393	0.868426	2.16862	1.16624
12.2946	-2.39422	5.54963	0.028834	3.56884	0.876924
13.1825	-2.54344	5.89114	0.0546245	3.84205	0.902788
13.7118	-2.65739	6.14728	0.0805081	4.04696	0.902565
14.3436	-2.76273	6.36926	0.088987
14.8388	-2.84176	6.60832	0.12361
		6.86446	0.166936
