# Supplementary material for: Modeling Static Behavior of Rockfill Materials Based on Generalized Plasticity Model
Source: Hindawi journal article supplement (doi:10.1155/2019/2371709), 2019-01-01
Supplement: f1 [file 2371709.f1.zip › 2371709.f1/Yang-conventional triaxial test.xlsx]

## Sheet: E1-Q
2600		2000		1400		700		200
εa	σ1-σ3
%	kPa
0	0	0	0	0	0	0	0	0	0
0.487541	828.625	0.507042	903.955	0.448537	813.559	0.487541	813.559	0.448537	225.989
1.03359	1386.06	1.03359	1416.2	1.03359	1280.6	0.95558	1265.54	0.95558	467.043
1.48212	1838.04	1.48212	1762.71	1.54063	1612.05	1.54063	1536.72	1.52113	677.966
2.00867	2290.02	2.00867	2139.36	2.00867	1838.04	1.93066	1657.25	2.00867	783.427
2.51571	2711.86	2.51571	2470.81	2.51571	2018.83	2.4377	1762.71	2.51571	828.625
3.04225	3043.31	3.02275	2726.93	2.98375	2184.56	3.02275	1928.44	3.08126	919.021
3.51029	3344.63	3.51029	2983.05	3.5493	2485.88	3.51029	2018.83	3.5493	979.284
3.99783	3645.95	4.05634	3224.11	4.05634	2681.73	4.05634	2109.23	4.05634	1009.42
4.54388	3992.47	4.48537	3435.03	4.48537	2787.19	4.54388	2184.56	4.54388	1024.48
5.03142	4293.79	5.03142	3645.95	4.99242	2967.98	4.99242	2259.89	5.07042	1024.48
5.51896	4580.04	5.51896	3887.01	5.51896	3088.51	5.55796	2290.02	5.51896	1054.61
6.0455	4896.42	6.026	4082.86	6.08451	3239.17	6.026	2380.41	6.08451	1024.48
6.55255	5182.67	6.43554	4278.72	6.59155	3374.76	6.53304	2410.55	6.49404	1054.61
7.00108	5453.86	6.98158	4489.64	7.02059	3495.29	7.00108	2485.88	6.98158	1024.48
7.46912	5740.11	7.44962	4685.5	7.46912	3676.08	7.56663	2531.07	7.50813	1024.48
7.99567	6026.37	8.03467	4881.36	7.97616	3781.54	8.03467	2561.21	8.05417	1009.42
8.56121	6282.49	8.48321	5047.08	8.50271	3932.2	8.67822	2576.27	8.54171	1024.48
9.02925	6478.34	9.02925	5197.74	9.06826	4037.66	9.06826	2621.47	8.97075	979.284
9.51679	6629	9.47779	5303.2	9.53629	4097.93	9.53629	2636.53	9.53629	1009.42
10.0433	6809.79	10.0433	5438.79	9.98483	4143.13	10.0628	2711.86	10.0433	1009.42
10.4919	6960.45	10.5309	5529.19	10.5309	4218.46	10.5114	2726.93	10.5114	1009.42
10.9599	7096.05	11.0184	5589.45	11.0184	4278.72	11.0379	2726.93	11.0769	1054.61
11.506	7201.51	11.506	5725.05	11.545	4369.11	11.5645	2742	11.506	1009.42
12.013	7306.97	12.013	5755.18	12.013	4399.25	12.013	2787.19	11.9935	1009.42
12.481	7397.36	12.481	5845.57	12.481	4429.38	12.481	2787.19	12.5395	979.284
13.0466	7532.96	13.0271	5951.04	13.0466	4519.77	13.0466	2832.39	13.0466	979.284
13.4951	7563.09	13.4951	6041.43	13.5536	4580.04	13.5536	2862.52	13.5536	964.218
14.0412	7683.62	14.0412	6101.69	14.0412	4625.24	13.9632	2877.59	14.0217	964.218
14.4897	7743.88	14.5287	6192.09	14.4702	4640.3	14.5287	2892.66	14.4897	979.284
15.0163	7834.27	14.9772	6297.55	15.0553	4700.56	14.8797	2877.59	14.9382	964.218
15.6598	7939.74	15.3283	6357.82	15.4453	4775.89	15.3868	2892.66	15.3868	934.087
		15.7573	6493.41	15.7963	4851.22	15.8353	2892.66	15.6988	934.087
		16.0498	6598.87	16.1083	4971.75	16.2839	2877.59
		16.4789	6704.33

## Sheet: E1-EV
2600		2000		1400		700		200
εa	εv
%	%
0.0190476	-0.0383795	0.0190476	-0.0383795	0.0190476	-0.0383795	0.0190476	-0.0383795	0.0190476	-0.0383795
0.479744	0.552381	0.441365	0.514286	0.479744	0.457143	0.479744	0.457143	0.518124	0.4
1.01706	1.18095	1.01706	1.08571	0.978678	1.04762	1.01706	0.8	0.978678	0.685714
1.4968	1.65714	1.4968	1.5619	1.4968	1.46667	1.55437	1.12381	1.57356	1.04762
1.95736	2.01905	1.97655	2.01905	2.01493	1.92381	2.0533	1.31429	2.03412	1.14286
2.53305	2.55238	2.55224	2.47619	2.51386	2.41905	2.53305	1.52381	2.49467	1.21905
3.03198	2.97143	3.01279	2.8	3.01279	2.74286	3.03198	1.71429	3.07036	1.2381
3.5693	3.33333	3.47335	3.18095	3.55011	3.1619	3.5693	1.90476	3.51173	1.2381
4.04904	3.69524	3.97228	3.54286	4.06823	3.46667	3.97228	2.01905	4.06823	1.21905
4.52878	4.07619	4.47122	3.80952	4.45203	3.69524	4.54797	2.19048	4.54797	1.14286
5.02772	4.38095	4.91258	4.09524	4.95096	4.01905	5.00853	2.28571	5.08529	1.12381
5.58422	4.70476	5.50746	4.45714	5.46908	4.22857	5.56503	2.4	5.50746	1.04762
6.0064	5.04762	5.98721	4.70476	5.98721	4.57143	6.0064	2.55238	6.06397	0.933333
6.52452	5.27619	6.54371	5.02857	6.5629	4.8381	6.52452	2.60952	6.48614	0.857143
7.06183	5.6	6.9467	5.21905	7.04264	5.04762	7.00426	2.68571	7.00426	0.685714
7.52239	5.82857	7.48401	5.50476	7.52239	5.21905	7.57996	2.78095	7.54158	0.514286
8.00213	6.0381	8.00213	5.69524	8.0597	5.42857	8.00213	2.8	8.00213	0.304762
8.57783	6.28571	8.48188	5.90476	8.53945	5.6	8.63539	2.85714	8.53945	0.114286
9.03838	6.47619	9.03838	6.07619	9.07676	5.80952	9.07676	2.93333	9.03838	-0.0571429
9.51812	6.59048	9.53731	6.19048	9.53731	5.90476	9.53731	2.95238	9.5565	-0.209524
10.0746	6.8	10.0746	6.32381	9.99787	6	10.0746	2.97143	9.99787	-0.361905
10.5544	6.87619	10.516	6.45714	10.4968	6.17143	10.516	3.02857	10.4776	-0.495238
10.9765	6.99048	10.9957	6.51429	10.9957	6.28571	11.0341	3.02857	11.0341	-0.647619
11.5139	7.06667	11.5139	6.60952	11.5139	6.38095	11.533	3.04762	11.533	-0.742857
12.0512	7.18095	12.032	6.68571	12.032	6.47619	12.0128	3.04762	12.032	-0.914286
12.5885	7.27619	12.5693	6.7619	12.4925	6.51429	12.4733	3.04762	12.5309	-1.04762
13.049	7.35238	13.0107	6.85714	13.0107	6.60952	13.0107	3.08571	13.0107	-1.14286
13.5288	7.40952	13.4904	6.87619	13.4904	6.64762	13.548	3.04762	13.5288	-1.25714
14.1045	7.50476	14.0085	6.97143	14.0469	6.70476	14.0469	3.08571	14.0469	-1.33333
14.5267	7.50476	14.5267	6.99048	14.5075	6.74286	14.5075	3.08571	14.5458	-1.40952
15.0832	7.46667	15.0832	6.97143	15.0256	6.7619	15.1215	3.08571	15.064	-1.54286
